# Supplementary material
Source: PubMed Central journal article supplement (PMC1735193)
Supplement: jmedgene_39_8_608__1.pdf [file jmedgene_39_8_608__1.pdf]

**Supplementary Table 1** Breast cancer patients carrying a *BRCA1/2* germline mutation and treated with neoadjuvant chemotherapy: clinicopathological characteristics and response to treatment

| ID    | Age at diagnosis | Mutation type            | Amino acid change | cT (cm) | cN | Histological type | Grade | ER status | Neoadjuvant chemotherapy | Tamoxifen* | Clinical response | Pathological response |
|-------|------------------|--------------------------|-------------------|---------|----|-------------------|-------|-----------|--------------------------|------------|-------------------|-----------------------|
| AJ257 | 60.4             | <i>BRCA2</i> : 6174delT  | Stop 2003         | 8.0     | 1  | Ductal            | 3     | Neg       | FACx3                    | No         | Complete          | Complete              |
| J279  | 47.6             | <i>BRCA1</i> : 4446C>T   | R1443X            | 7.0     | 0  | Undifferentiated  | 3     | Neg       | ACx4                     | Yes        | Complete          | Complete              |
| J322  | 47.5             | <i>BRCA2</i> : 8765delAG | Stop 2867         | 1.3     | 0  | Ductal            | 2     | Pos       | ACx4 + Dx4               | Yes        | Complete†         | Complete              |
| 1162  | 31.9             | <i>BRCA1</i> : 4446C>T   | R1443X            | 4.2     | 0  | Undifferentiated  | 3     | NA        | ACx4                     | Yes        | Complete          | Complete              |
| J007  | 43.4             | <i>BRCA1</i> : 5382insC  | Stop 1829         | 10.0    | 1  | Ductal            | 3     | Pos       | ACx4                     | Yes        | Complete          | Incomplete            |
| J415  | 50.6             | <i>BRCA2</i> : 6174delT  | Stop 2003         | 6.0     | 1  | Ductal            | 3‡    | Pos‡      | ACx4                     | No         | Complete          | Incomplete            |
| 1108  | 32.2             | <i>BRCA2</i> : 6085G>T   | E1953X            | 7.0     | 1  | Ductal            | 2     | Neg‡      | CEFx3                    | NA         | Complete          | Incomplete            |
| 99076 | 38.9             | <i>BRCA1</i> : 185delAG  | Stop 39           | 6.3     | 1  | Ductal            | 3‡    | Neg‡      | FACx4                    | No         | Complete          | Incomplete            |
| 1236  | 49.9             | <i>BRCA1</i> : 4446C>T   | R1443X            | 6.0     | 0  | Adenoca           | 2     | NA        | ACx4 + CMFx6             | Yes        | Complete‡         | NE                    |
| 98120 | 40.3             | <i>BRCA1</i> : 4446C>T   | R1443X            | 2.0     | 0  | Ductal            | 3     | Neg       | FACx4                    | No         | Complete          | NE                    |
| 1134  | 42.2             | <i>BRCA1</i> : 4446C>T   | R1443X            | 3.0     | 1  | Ductal            | 2     | Neg‡      | ACx4 + Dx4               | Yes        | Partial‡          | Incomplete            |

A, doxorubicin (Adriamycin®); adenoca, adenocarcinoma; C, cyclophosphamide; cN, clinical axillary lymph node status; cT, clinical tumour size; D, docetaxel (Taxotere®); E, epirubicin; ER, oestrogen receptor; F, 5-fluorouracil; M, methotrexate; NA, not available; NE, not evaluable; Neg, negative; Pos, positive.

\*Concomitant administration with the neoadjuvant chemotherapy.

†Evaluated after four cycles of chemotherapy.

‡Evaluated after the neoadjuvant chemotherapy (at the time of surgery).
