# Supplementary material
Source: PubMed Central journal article supplement (PMC1735193)
Supplement: jmedgene_39_8_608__2.pdf [file jmedgene_39_8_608__2.pdf]

**Supplementary Table 2** Breast cancer patients who do not carry a *BRCA1/2* germline mutation, treated with neoadjuvant chemotherapy: clinico-pathological characteristics and response to treatment

| ID    | Age at diagnosis | cT (cm) | cN | Histological type | Grade | ER status | Neoadjuvant chemotherapy | Tamoxifen* | Clinical response | Pathological response |
|-------|------------------|---------|----|-------------------|-------|-----------|--------------------------|------------|-------------------|-----------------------|
| 1279  | 36.7             | 2.5     | 1  | Ductal            | 3     | Neg       | ACx4                     | Yes        | Complete          | Complete              |
| 1191  | 39.3             | 8.0     | 1  | Ductal            | 2‡    | NA        | ACx4                     | No         | Complete          | Incomplete            |
| AJ59  | 47.5             | 10.0    | 0  | Ductal            | 3     | Pos       | ECx6                     | No         | Complete†         | Incomplete            |
| AJ79  | 60.8             | 1.0     | 0  | Ductal            | 1‡    | Pos‡      | ACx4                     | No         | Complete          | Incomplete            |
| AJ115 | 50.4             | 3.5     | 0  | Adenoca           | 3‡    | Neg‡      | ACx4                     | No         | Complete          | Incomplete            |
| AJ279 | 52.8             | 2.0     | 0  | Ductal            | 2‡    | Neg‡      | ACx4                     | No         | Complete          | Incomplete            |
| FC117 | 54.6             | 3.2     | 0  | Ductal            | 3     | Pos       | ACx4                     | Yes        | Complete          | Incomplete            |
| 1250  | 40.0             | 2.0     | 0  | Ductal            | NA    | Pos       | ACx4                     | Yes        | Complete          | Incomplete            |
| AJ396 | 58.2             | 10.0    | 0  | Ductal            | 3     | Neg       | FACx6                    | No         | Partial†          | Incomplete            |
| AJ32  | 46.2             | 11.0    | 0  | Ductal            | 3‡    | Neg‡      | Px4                      | No         | Partial           | Incomplete            |
| AJ84  | 54.8             | 5.0     | 1  | Ductal            | 3     | Neg‡      | ACx4                     | No         | Partial           | Incomplete            |
| AJ142 | 44.8             | 2.0     | 0  | Ductal            | 3‡    | Pos‡      | ACx4                     | No         | Partial           | Incomplete            |
| FC59  | 58.0             | 5.0     | 0  | Ductal            | 2‡    | Pos‡      | ACx4                     | Yes        | Partial           | Incomplete            |
| FC80  | 48.0             | 4.0     | 0  | Ductal            | 1‡    | Pos‡      | ACx4                     | Yes        | Partial           | Incomplete            |
| J418  | 38.2             | 2.5     | 0  | Ductal            | 2     | NA        | ACx4                     | No         | Partial           | Incomplete            |
| 1129  | 34.8             | 6.0     | 1  | Ductal            | 2     | Pos‡      | ACx4                     | No         | Partial           | Incomplete            |
| 1138  | 39.2             | 3.4     | 1  | Ductal            | 1     | Pos‡      | ACx4                     | Yes        | Partial           | Incomplete            |
| 1139  | 35.3             | 3.0     | 0  | Ductal            | 3     | Pos‡      | ACx4                     | Yes        | Partial           | Incomplete            |
| 1179  | 34.3             | 2.8     | 0  | Ductal            | 2‡    | Pos‡      | ACx4                     | Yes        | Partial           | Incomplete            |
| 1209  | 35.9             | 6.0     | 0  | Ductal            | 3     | Neg       | ACx4 + Dx4               | Yes        | Partial†          | Incomplete            |
| 1218  | 39.9             | 3.0     | 0  | Ductal            | 3‡    | Pos       | ACx4                     | Yes        | Partial           | Incomplete            |
| 1238  | 39.7             | 4.0     | 1  | Ductal            | 3     | Pos       | ACx4                     | No         | Partial           | Incomplete            |
| 1249  | 38.9             | 2.6     | 0  | Ductal            | 1     | Pos       | ACx4                     | Yes        | Partial           | Incomplete            |
| 98114 | 70.1             | 4.5     | 0  | Ductal            | NA    | Pos‡      | ACx4                     | Yes        | Partial           | Incomplete            |
| AJ156 | 48.7             | 7.0     | 0  | Ductal            | 3‡    | Pos‡      | ACx5                     | No         | Partial†          | Incomplete            |
| AJ386 | 57.7             | 12.0    | 1  | Ductal            | 3‡    | Neg       | FACx6                    | No         | No change†        | Incomplete            |
| 97008 | 79.4             | 5.0     | 0  | Ductal            | 3‡    | Neg‡      | ACx4                     | No         | No change         | Incomplete            |

A, doxorubicin (Adriamycin®); adenoca, adenocarcinoma; C, cyclophosphamide; cN, clinical axillary lymph node status; cT, clinical tumour size; D, docetaxel (Taxotere®); E, epirubicin; ER, oestrogen receptor; F, 5-fluorouracil; NA, not available; Neg, negative; P, paclitaxel (Taxol®); Pos, positive.

\*Concomitant administration with the neoadjuvant chemotherapy.

†Evaluated after four cycles of chemotherapy.

‡Evaluated after the neoadjuvant chemotherapy (at the time of surgery).
